# Supplementary material for: Adenosine deaminase modulates metabolic remodeling and orchestrates joint destruction in rheumatoid arthritis
Source: PubMed Central journal article supplement (PMC8302689; doi:10.1038/s41598-021-94607-5), 2021-07-23
Supplement: 41598_2021_94607_MOESM1_ESM.pdf [file 41598_2021_94607_MOESM1_ESM.pdf]

## **Adenosine deaminase modulates metabolic remodeling and orchestrates joint destruction in rheumatoid arthritis**

Sai Krishna Srimadh Bhagavatham<sup>1</sup>; Prakash Khanchandani<sup>2\*</sup>; Vishnu Kannan<sup>1,3</sup>; Damodaram Potikuri<sup>4</sup>; Divya Sridharan<sup>5</sup>, Sujith Kumar Pulukool<sup>1</sup>; Ashwin Ashok Naik<sup>1</sup>; Rajesh Babu Dandamudi<sup>6,7</sup>; Sai Mangala Divi<sup>8</sup>; Ashish Pargaonkar<sup>9</sup>; Rahul Ray<sup>2</sup>; Saibharath Simha Reddy Santha<sup>1</sup>; Polani B Seshagiri<sup>5</sup>, Narasimhan K<sup>4</sup>; Narsimulu Gumdal<sup>4</sup>, Venketesh Sivaramakrishnan<sup>1\*</sup>

<sup>1</sup>Department of Biosciences, Sri Sathya Sai Institute of Higher Learning, Puttaparthi, India – 515134.

<sup>2</sup>Department of Orthopedics, Sri Sathya Sai Institute of Higher Medical Sciences, PG, Puttaparthi, India – 515134.

<sup>3</sup>Current address: Department of Botany/Biotechnology, CMS College, Kottayam, India – 686001.

<sup>4</sup>Sri Sathya Sai General Hospital, Puttaparthi, India – 515134.

<sup>5</sup>Molecular Reproduction and Developmental Genetics, Indian Institute of Science, Bangalore – 560012.

<sup>6</sup>Previous address: Department of Chemistry, Sri Sathya Sai Institute of Higher Learning, Prasanthi Nilayam, India.

<sup>7</sup>Current address: Phenomenex India, Hyderabad, Telangana, India – 500084.

<sup>8</sup>Department of Biochemistry, Sri Sathya Sai Institute of Higher Medical Sciences, PG, Puttaparthi, India – 515134.

<sup>9</sup>Agilent Technologies India Pvt Ltd, Bengaluru, India - 560048.

\*To whom correspondence has to be sent:

Venketesh Sivaramakrishnan [s.venketesh@gmail.com](mailto:s.venketesh@gmail.com), and

Venketesh Sivaramakrishnan ORCID- 0000-0003-3094-5905

Prakash Khanchandani [prakash.k@sssihms.org.in](mailto:prakash.k@sssihms.org.in)

**Figure S1:**

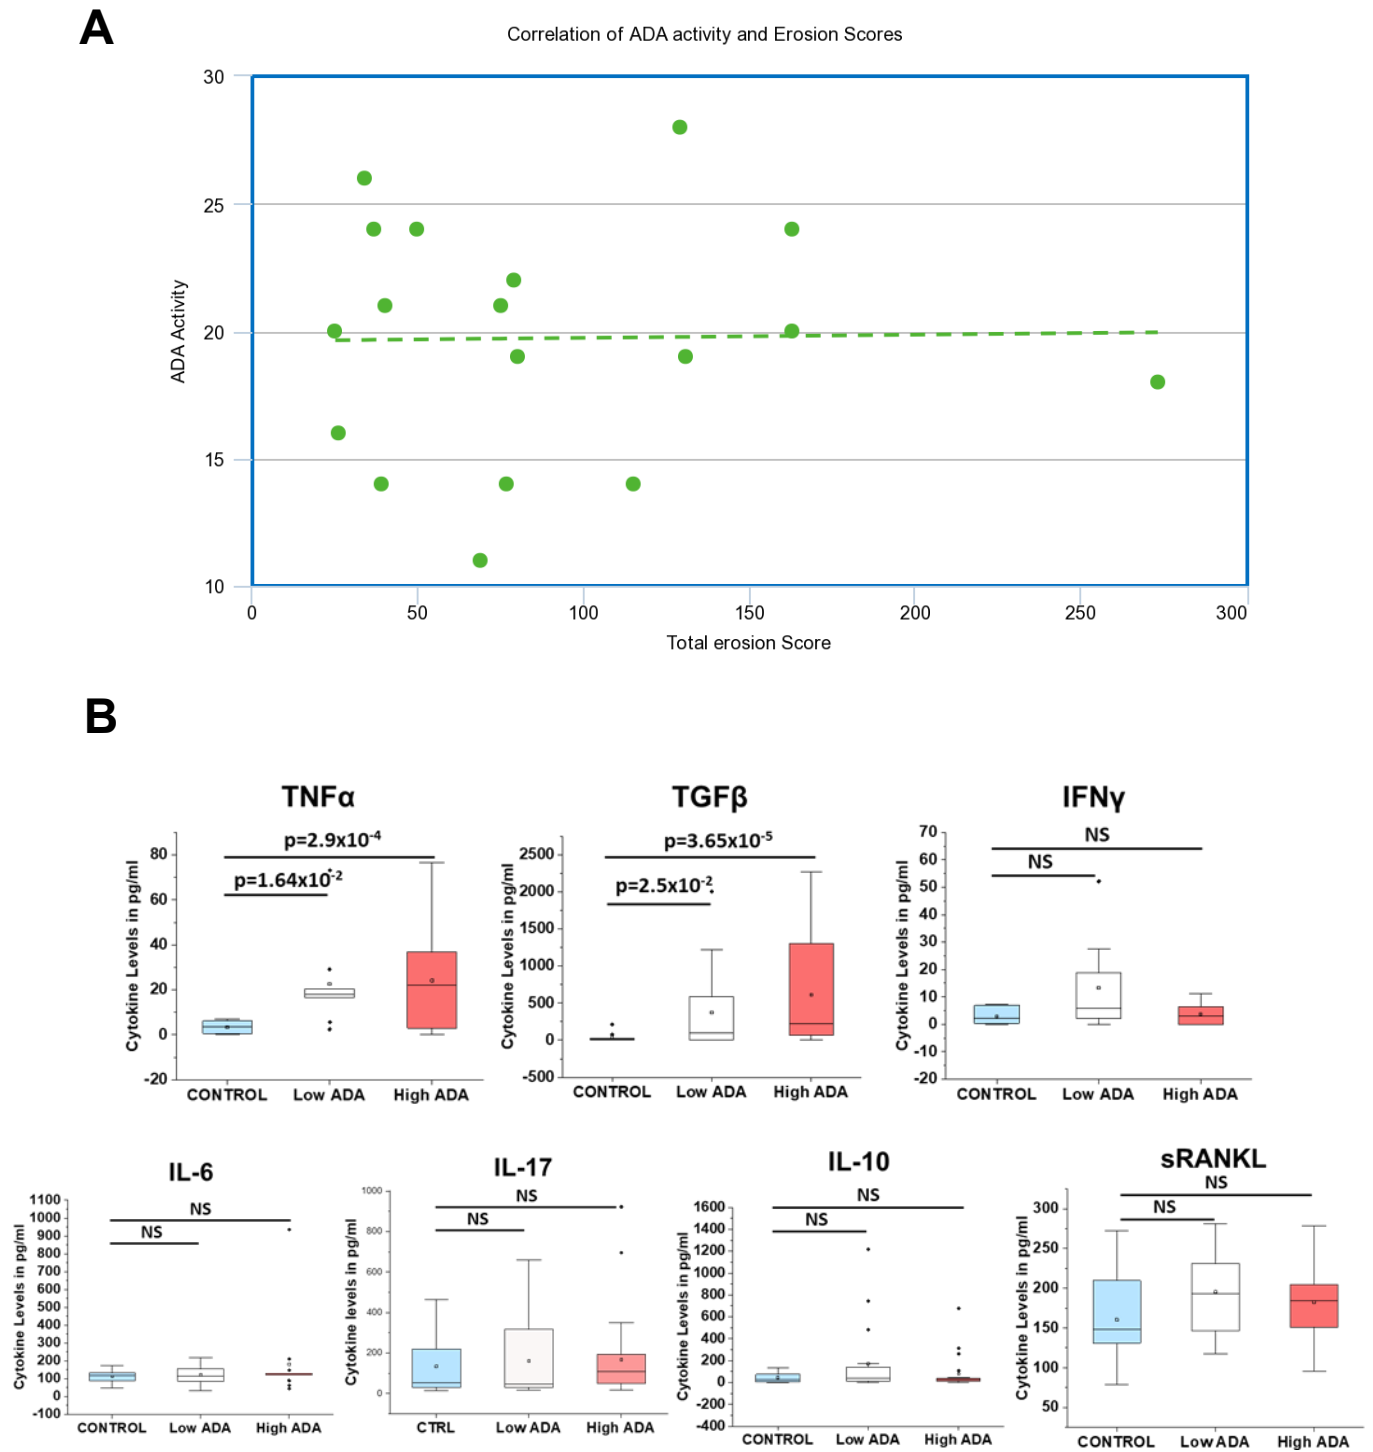

**A.** Correlation analysis of ADA levels with SHARP Score of RA patients **B.** T-test analysis of Cytokines of Low ADA and High ADA RA patients with healthy controls.

**Figure S2: Relative abundance levels of samples after log transformation and normalization based on the internal standards in both positive and negative ionization methods.**

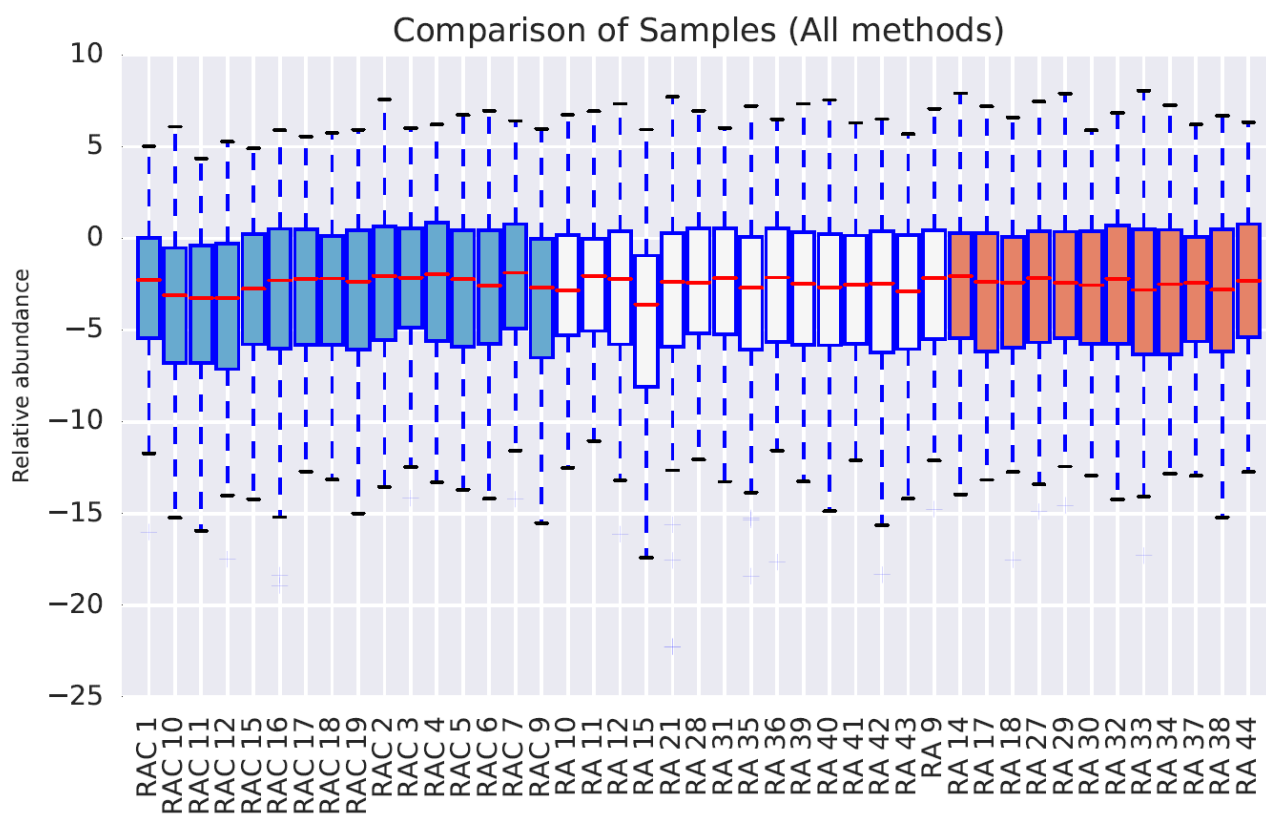

**Figure S3: Correlation analysis showing good concordance among the replicates done on different days as quality control in Positive Ionization Mode.**

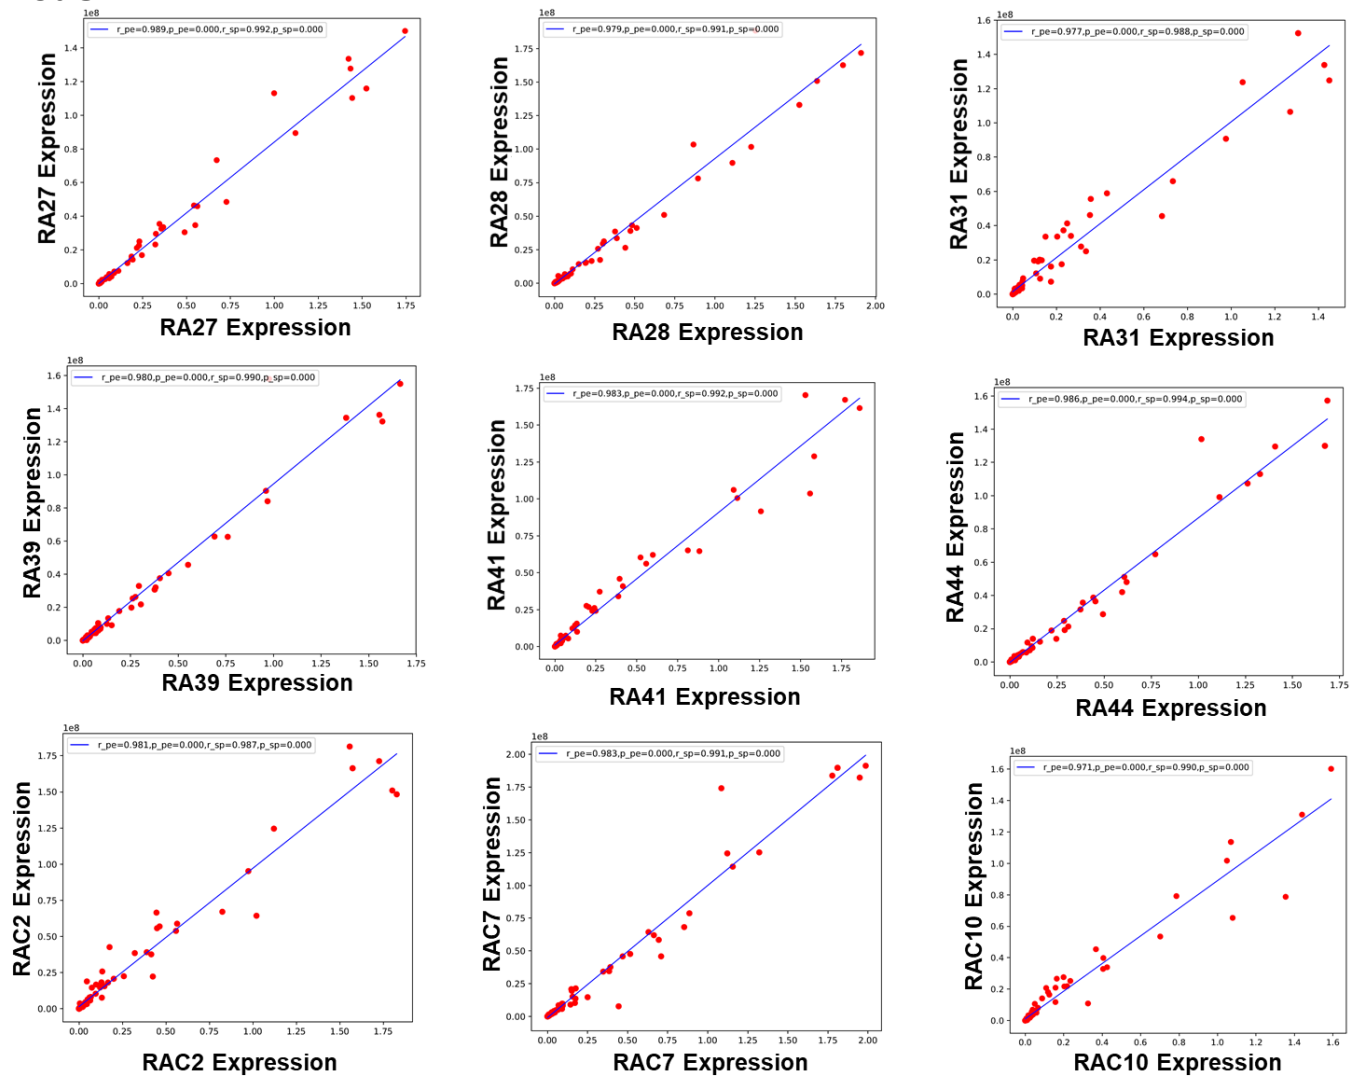

**Figure S4: Correlation analysis showing good concordance among the replicates done on different days as quality control in Negative Ionization Mode.**

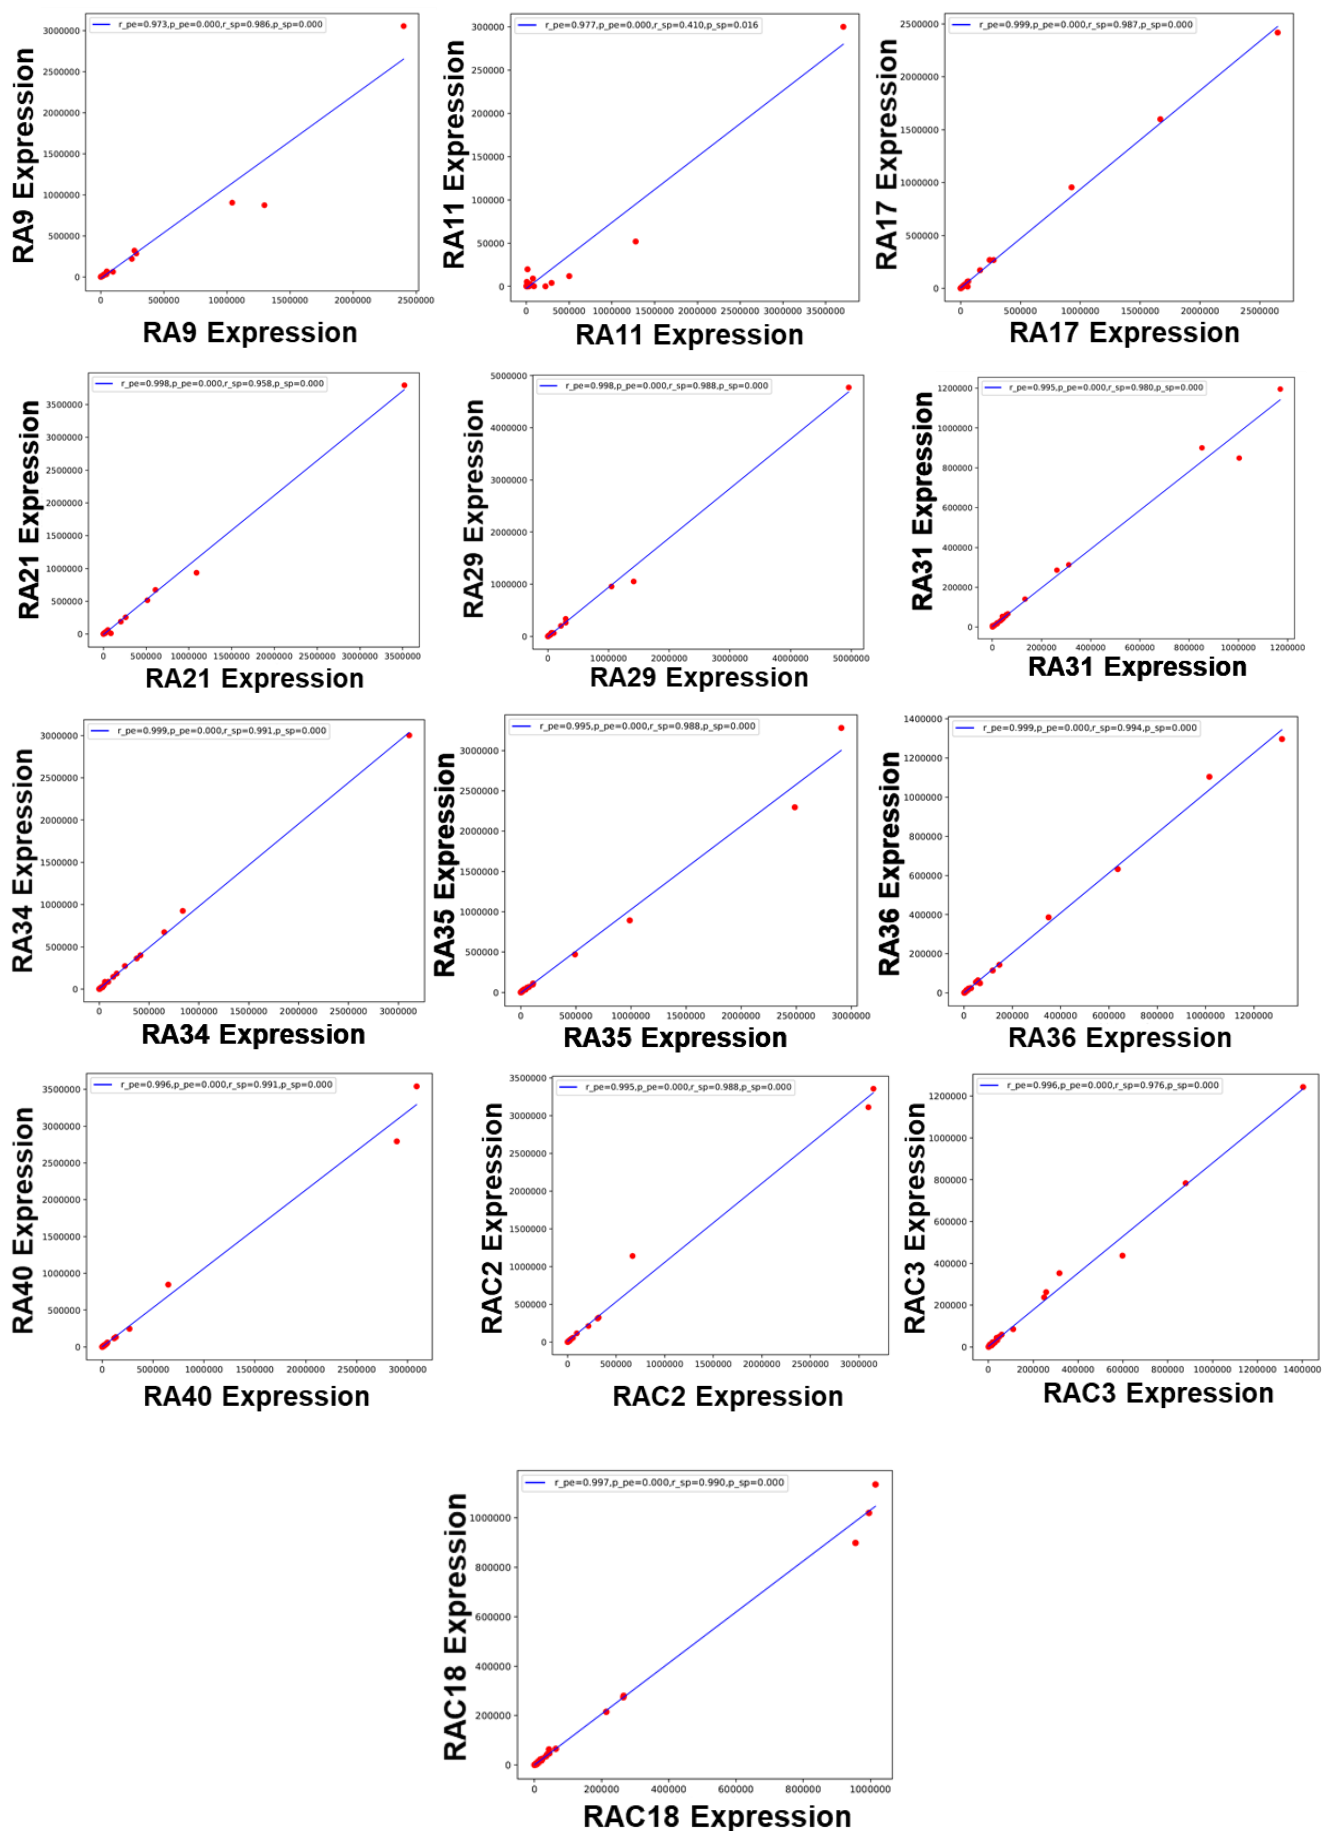

**Figure S5: Targeted Metabolomics data showing altered metabolic signatures in RA patients with High ADA levels compared to Low ADA levels**

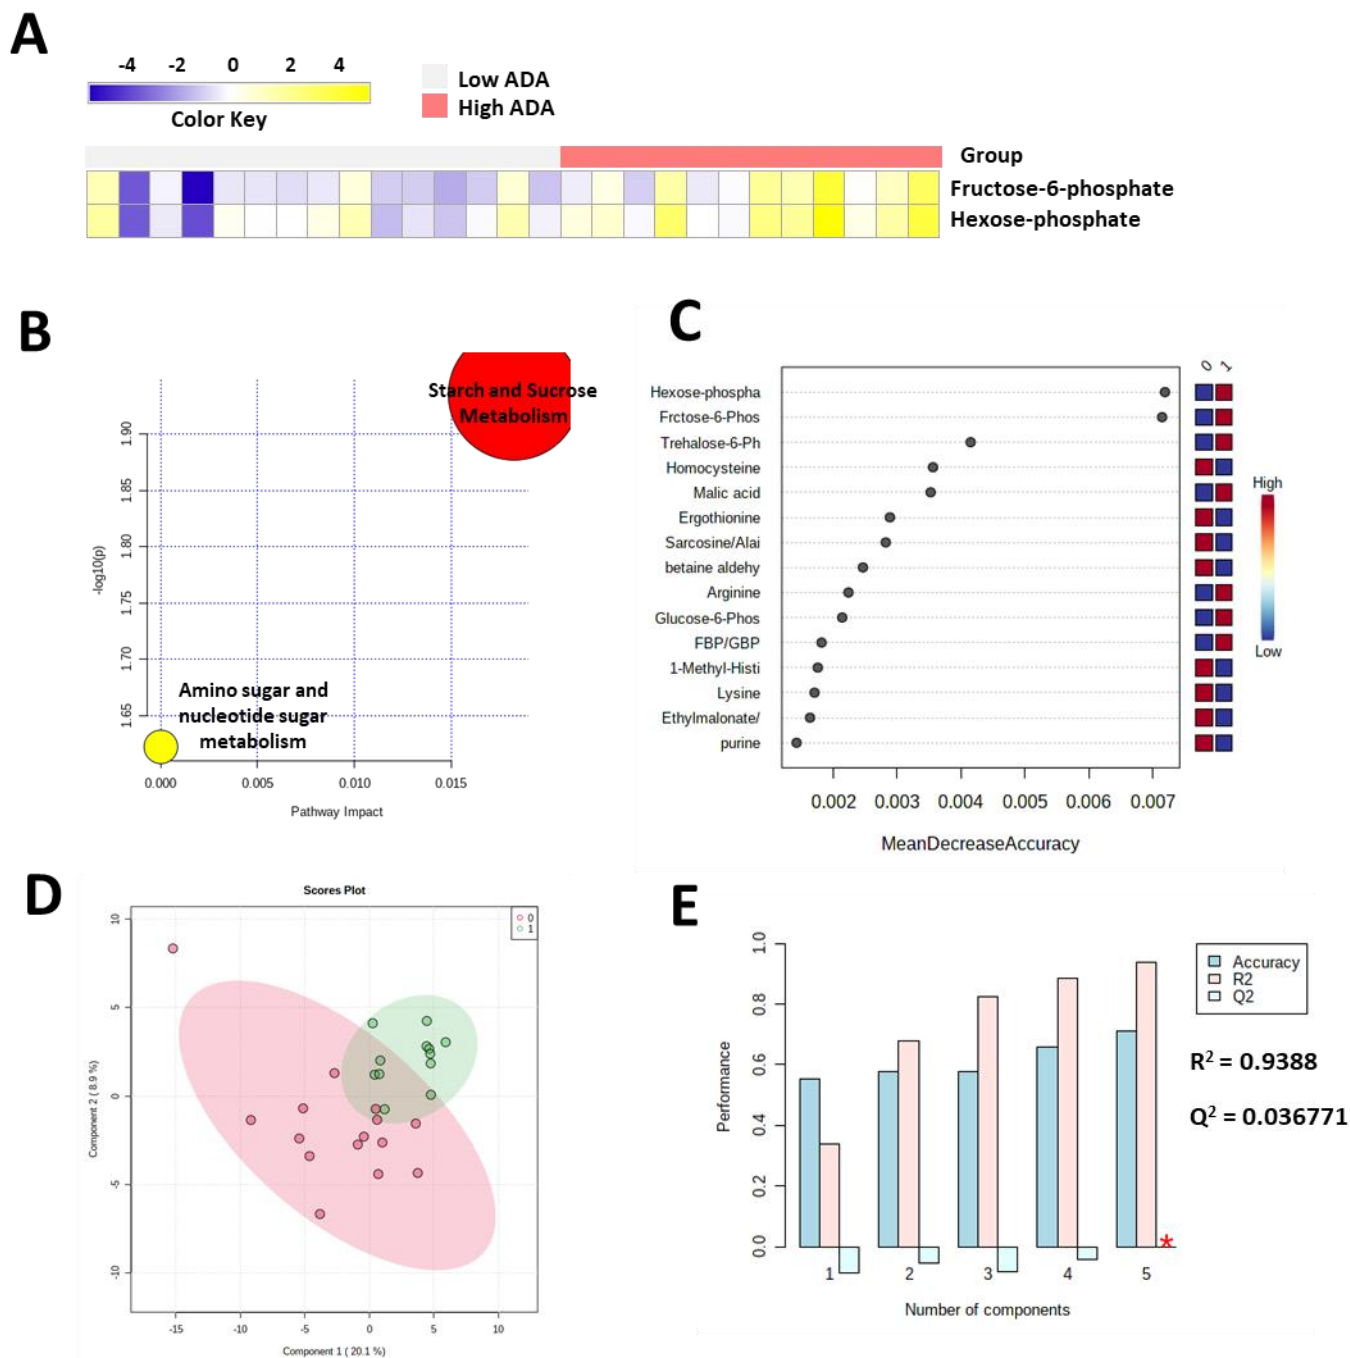

**A.** Heat map showing the relative levels of 2 significantly altered metabolites at FDR 0.25 with shades of yellow and blue representing the elevated and reduced metabolite levels, respectively (heatmaps were made in Microsoft Excel). **B.** Pathway analysis showing altered metabolic pathways in RA Patients with High ADA levels compared to Low ADA levels. The size of the circle represents the impact of each pathway and color represents the level of significance (highest in red to lowest in yellow). **C.** Ranking of significant metabolites based on random forest analysis for their ability to stratify RA patients with High ADA levels from Low ADA levels (ranked by the mean decrease in classification accuracy when they are permuted). **D.** PLS-DA clustering given by score plot (0=Low ADA RA patients, 1=High ADA RA patients) and **E.** cross validation of PLS-DA of RA patients with Low ADA and High ADA levels (red star indicates the best classifier based on accuracy, R<sup>2</sup>, and Q<sup>2</sup> values) (Figures B, C, D, and E were generated using the web-based tool Metaboanalyst <https://www.metaboanalyst.ca/>).

**Figure S6: Targeted Metabolomics data showing altered metabolic signatures in RA patients with low ADA levels compared to healthy controls**

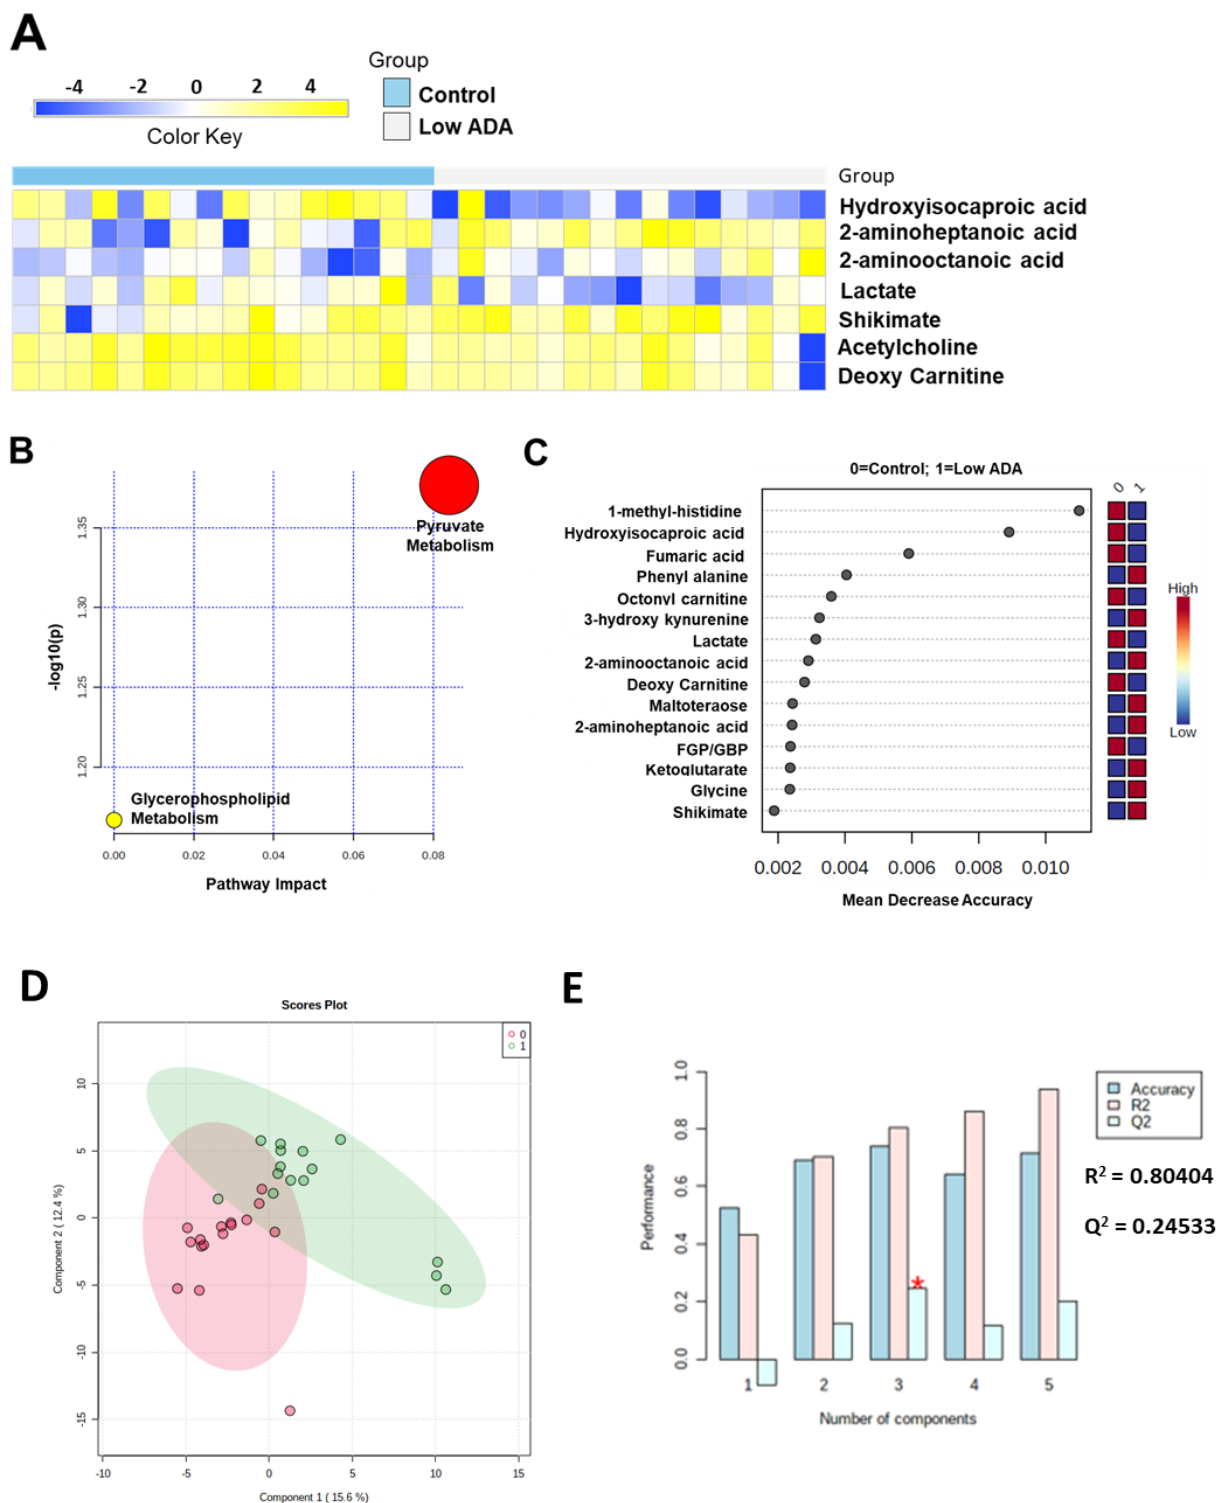

**A.** Heat map showing the relative levels of 7 significantly altered metabolites at FDR 0.25 with shades of yellow and blue representing the elevated and reduced metabolite levels, respectively (heatmaps were made in Microsoft Excel). **B.** Pathway analysis showing altered metabolic pathways in RA Patients with low ADA levels compared to healthy controls. The size of the circle represents the impact of each pathway and color represents the level of significance (highest in red to lowest in yellow). **C.** Ranking of significant metabolites based on random forest analysis for their ability to stratify RA patients with low ADA levels from healthy controls (ranked by the mean decrease in classification accuracy when they are permuted). **D.** PLS-DA clustering given by score plot (0=Control, 1=Low ADA) and **E.** cross validation of PLS-DA of RA patients with healthy controls and Low ADA levels (red star indicates the best classifier based on accuracy,  $R^2$ , and  $Q^2$  values) (Figures B, C, D, and E were generated using the web-based tool [Metaboanalyst https://www.metaboanalyst.ca/](https://www.metaboanalyst.ca/)).

**Figure S7a: Targeted Metabolomics data showing altered metabolic signatures in RA patients with high ADA levels compared to healthy controls.**

**A**

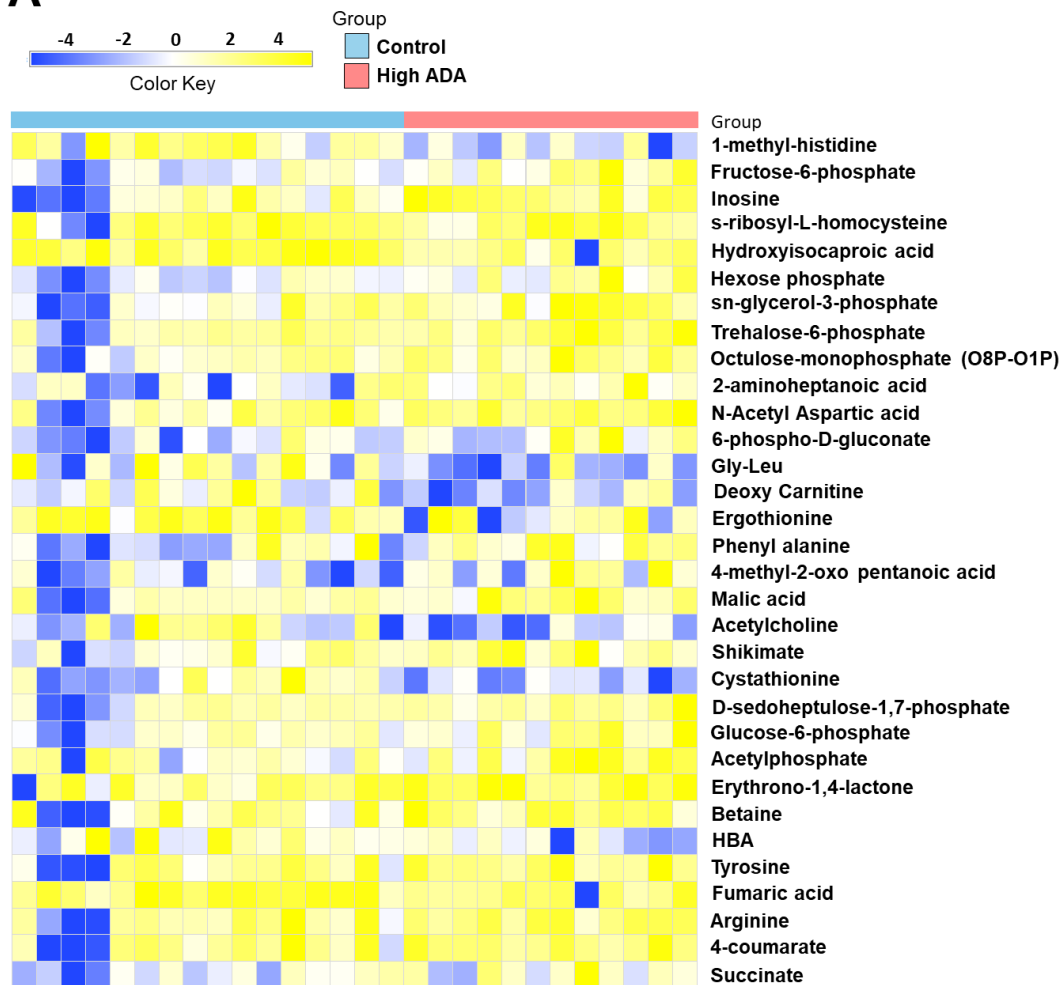

**B**

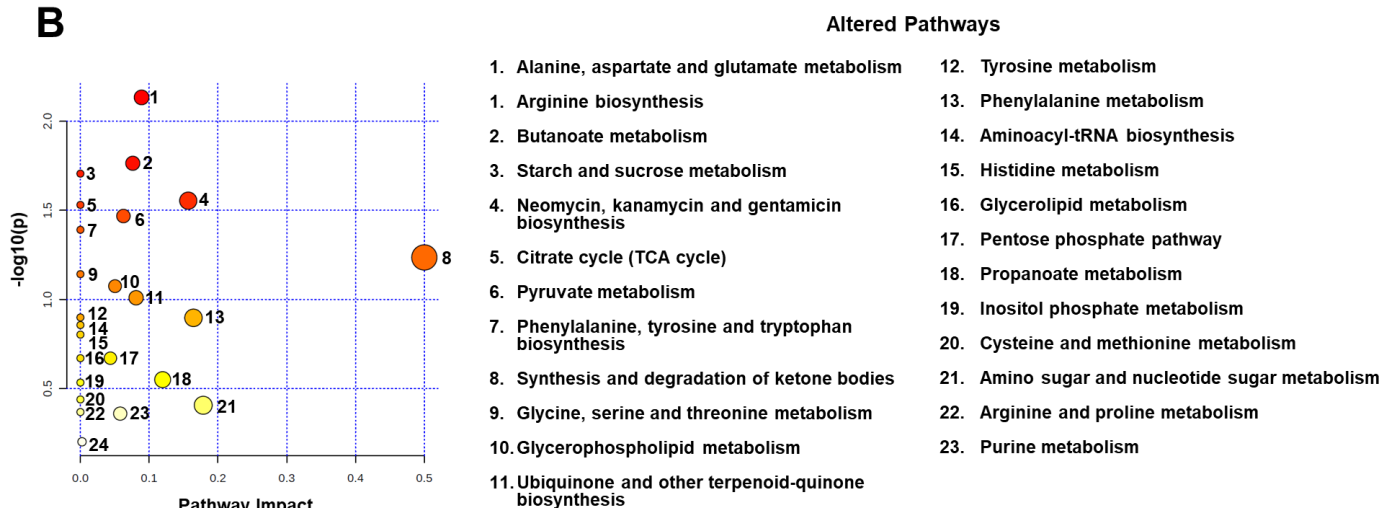

**A.** Heat map showing the relative levels of 32 significantly altered metabolites at FDR 0.25 with shades of yellow and blue representing the elevated and reduced metabolite levels, respectively (heatmaps were made in Microsoft Excel). **B.** Pathway analysis showing altered metabolic pathways in RA Patients with high ADA levels compared to healthy controls. The size of the circle represents the impact of each pathway and color represents the level of significance (highest in red to lowest in yellow) (Figures B was generated using the web-based tool Metaboanalyst <https://www.metaboanalyst.ca/>).



**Figure S7b: Targeted Metabolomics data showing altered metabolic signatures in RA patients with high ADA levels compared to healthy controls.**

**C**

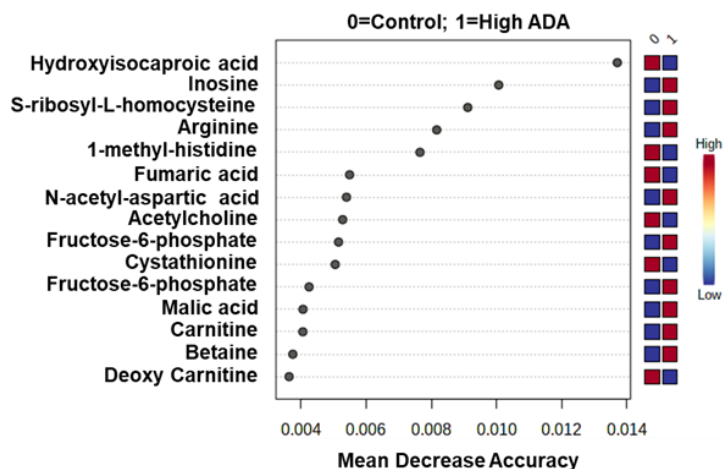

**D**

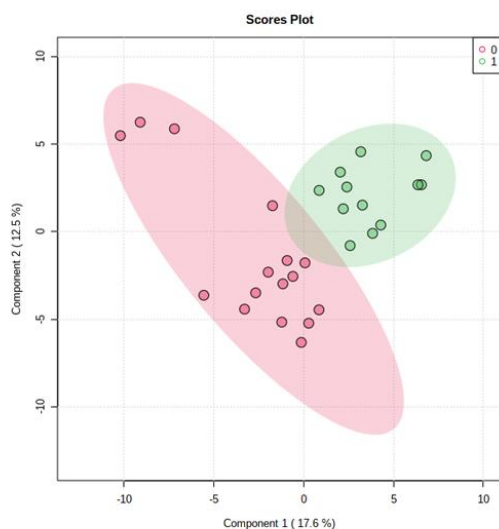

**E**

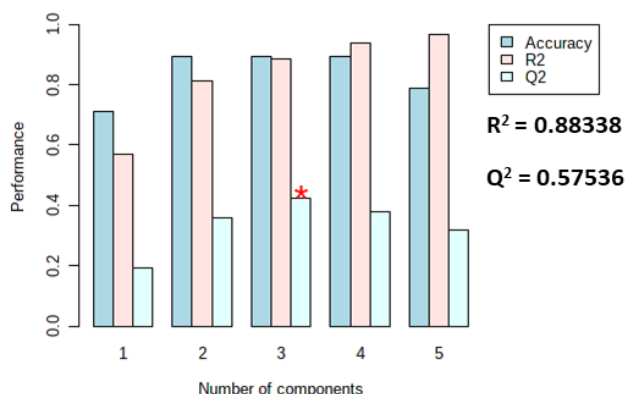

**C.** Ranking of significant metabolites based on random forest analysis for their ability to stratify RA patients with high ADA levels from healthy controls (ranked by the mean decrease in classification accuracy when they are permuted). **D.** PLS-DA clustering given by score plot (0=Control, 1=High ADA) and **E.** cross validation of PLS-DA of RA patients with healthy controls and High ADA levels (red star indicates the best classifier based on accuracy,  $R^2$ , and  $Q^2$  values) (Figures C, D, and E were generated using the web-based tool Metaboanalyst <https://www.metaboanalyst.ca/>).

**Figure S8: Comparative pathway analysis of High ADA and Low ADA metabolomics datasets of current study with High ADA and Low ADA expressing Transcriptomics datasets from GEO database**

(Venn Diagrams were created using an online tool <https://www.molbiotools.com/listcompare.php> ).

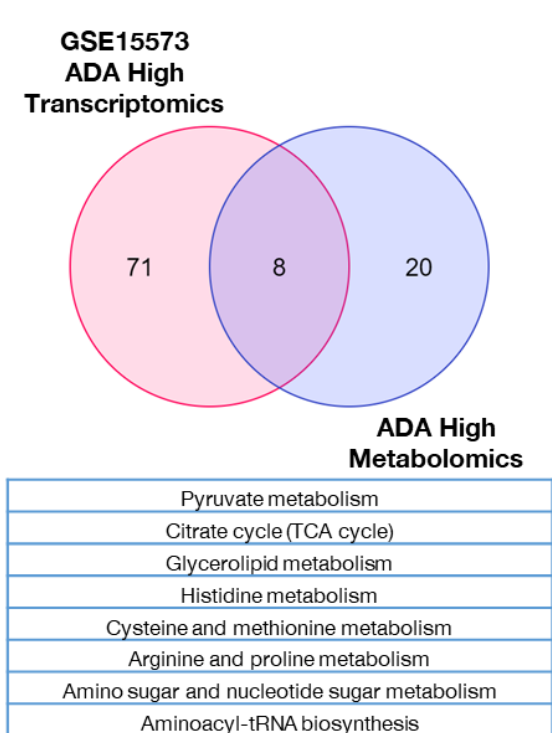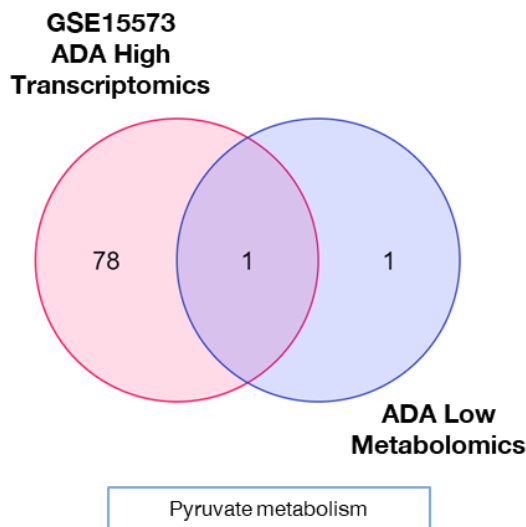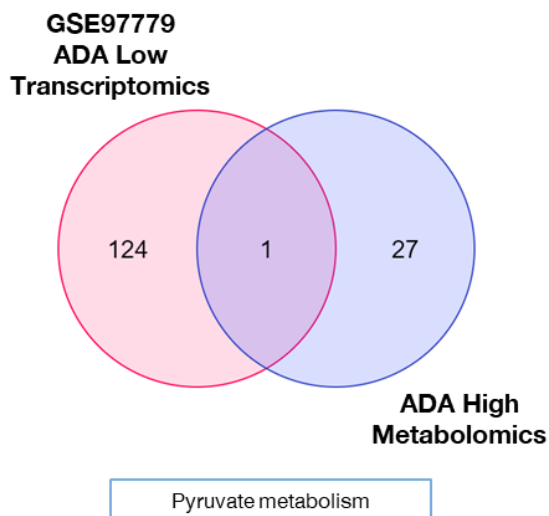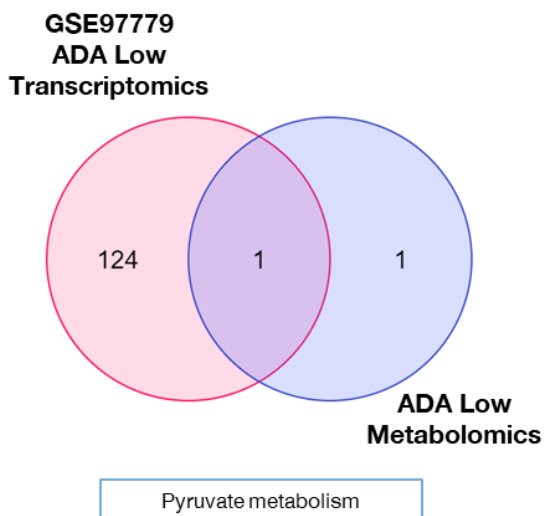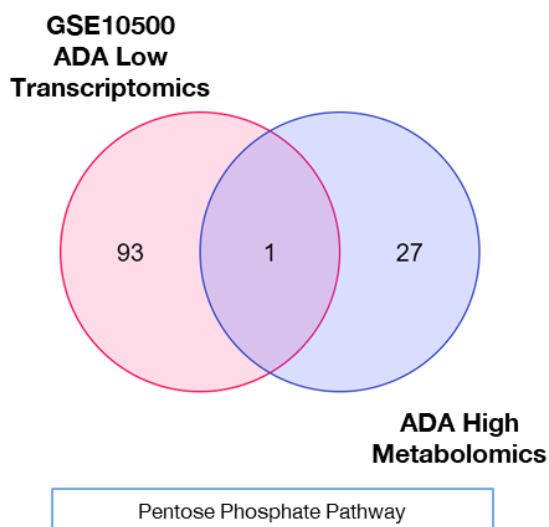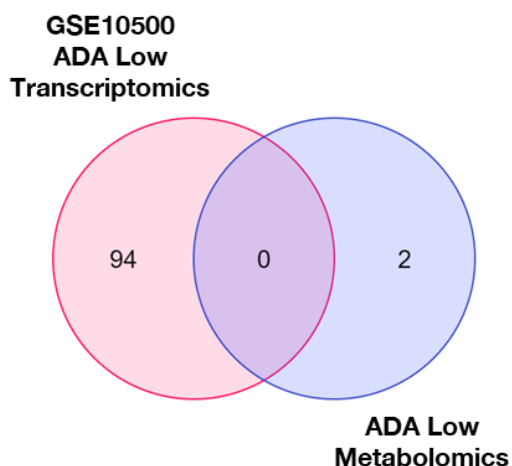

**Figure S9: Comparative pathway analysis of serum metabolic datasets of current study with metabolomic datasets of RA patients treated with Rituximab (Biologics) and Methotrexate (DMARD).**

| PATHWAYS                              | Control Vs RA             | Rituximab Treatment                   |                                     | Methotrexate Treatment       |
|---------------------------------------|---------------------------|---------------------------------------|-------------------------------------|------------------------------|
|                                       |                           | Before                                | After                               |                              |
|                                       | Current Study             | Shannon R Sweeney et al.              |                                     | Ryan S. Funk et al           |
| Glycerolipid metabolism               | sn-glycerol-3-phosphate ↑ | Glycerol ↑                            | Glycerol ↓                          |                              |
| Glycerophospholipid metabolism        | sn-glycerol-3-phosphate ↑ |                                       |                                     | Phosphatidyl inositol 32:0 ↓ |
| Glycolysis/Gluconeogenesis            | Lactate ↓                 | Glucose ↓                             | Glucose ↓                           |                              |
| Histidine Metabolism                  | 1-methyl Histidine ↓      | β-alanine ↓                           | β-alanine ↑                         |                              |
| Phenylalanine and Tyrosine metabolism | Phenylalanine ↑           | Acetoacetate ↓, Phenylalanine ↓       | Acetoacetate ↓, Phenylalanine ↓     |                              |
| Phospholipid Biosynthesis             | Acetylcholine ↓           | Choline ↓                             | Choline ↓                           |                              |
| Purine Metabolism                     | Inosine ↑                 | Glycine ↓, Hypoxanthine ↓, Xanthine ↑ | Glycine, Hypoxanthine ↓, Xanthine ↓ | Inosine monophosphate ↑      |
| Pyruvate metabolism                   | Lactate ↓                 | Pyruvate ↑                            | Pyruvate ↑                          |                              |

| PATHWAYS                   | Control Vs Low ADA | Rituximab Treatment      |            | Methotrexate Treatment |
|----------------------------|--------------------|--------------------------|------------|------------------------|
|                            |                    | Before                   | After      |                        |
|                            | Current Study      | Shannon R Sweeney et al. |            | Ryan S. Funk et al     |
| Phospholipid Biosynthesis  | Acetylcholine ↓    | Choline ↓                | Choline ↓  |                        |
| Glycolysis/Gluconeogenesis | Lactate ↓          | Glucose ↓                | Glucose ↓  |                        |
| Pyruvate metabolism        | Lactate ↓          | Pyruvate ↑               | Pyruvate ↑ |                        |

| PATHWAYS                                    | Control Vs High ADA                                  | Rituximab Treatment                    |                                        | Methotrexate Treatment       |
|---------------------------------------------|------------------------------------------------------|----------------------------------------|----------------------------------------|------------------------------|
|                                             |                                                      | Before                                 | After                                  |                              |
|                                             | Current Study                                        | Shannon R Sweeney et al.               |                                        | Ryan S. Funk et al           |
| Arginine biosynthesis                       | Arginine ↑                                           | Glutamine ↑, Ornithine ↓               | Glutamine ↓, Ornithine ↓               |                              |
| Arginine and Proline Metabolism             | Succinate ↑                                          | Glycine ↓, Urea ↓                      | Glycine ↓, Urea ↑                      |                              |
| Aspartate metabolism                        | Arginine ↑, Fumaric Acid ↓, N-acetyl Aspartic Acid ↑ | Asparagine ↓, Aspartate ↑, β-alanine ↓ | Asparagine ↓, Aspartate ↑, β-alanine ↑ | Inosine monophosphate ↑      |
| Betaine Metabolism                          | Betaine ↑                                            | Betaine ↓                              | Betaine ↓                              |                              |
| Carnitine synthesis                         | Succinate ↑                                          | Carnitine ↓, Lysine ↓                  | Carnitine ↓, Lysine ↓                  |                              |
| Citric acid cycle                           | Malic Acid ↑                                         | Pyruvate ↑                             | Pyruvate ↑                             |                              |
| Fatty Acid Biosynthesis                     | Hydroxy Butyric Acid ↓                               | 3-Hydroxybutyrate ↑                    | 3-Hydroxybutyrate ↓                    |                              |
| Galactose metabolism                        | Glucose-6-Phosphate ↑                                | Glycerol ↓                             | Glycerol ↓                             | Fructose ↑                   |
| Gluconeogenesis                             | Glucose-6-Phosphate ↑                                | Pyruvate ↑, Glucose ↓                  | Pyruvate ↑, Glucose ↓                  |                              |
| Glutamate Metabolism                        | Succinate ↑, Fructose-6-Phosphate ↑                  | Glutamate ↑, Glutamine ↑, Pyruvate ↑   | Glutamate ↓, Glutamine ↓, Pyruvate ↑   |                              |
| Glycerolipid metabolism                     | sn-glycerol-3-phosphate ↑                            | Glycerol ↑                             | Glycerol ↓                             |                              |
| Glycerophospholipid metabolism              | sn-glycerol-3-phosphate ↑                            |                                        |                                        | Phosphatidyl inositol 32:0 ↓ |
| Histidine Metabolism                        | 1-methyl Histidine, Ergothionine ↓                   | β-alanine ↓                            | β-alanine ↑                            |                              |
| Homocysteine Degradation                    | Cystathionine ↓                                      | Serine ↓                               | Serine ↓                               |                              |
| Methionine Metabolism                       | Betaine ↑, Cystathionine ↓                           | Betaine ↓, Choline ↓                   | Betaine ↓, Choline ↓                   |                              |
| Oxidation of branched chain fatty acids     | Succinate ↑                                          | O-Acetyl carnitine ↓                   | O-Acetyl carnitine ↓                   |                              |
| Phenylalanine and Tyrosine metabolism       | Tyrosine ↑, Phenylalanine ↑                          | Acetoacetate ↓, Phenylalanine ↓        | Acetoacetate ↓, Phenylalanine ↓        |                              |
| Phospholipid Biosynthesis                   | Acetylcholine ↓                                      | Choline ↓                              | Choline ↓                              |                              |
| Pyruvate metabolism                         | Acetylphosphate ↑, Malic Acid ↑                      | Pyruvate ↑                             | Pyruvate ↑                             |                              |
| Sphingolipid metabolism                     |                                                      | Serine ↓                               | Serine ↓                               |                              |
| Starch and Sucrose Metabolism               | Glucose-6-Phosphate ↑                                |                                        |                                        | Fructose ↑                   |
| Valine, leucine and isoleucine biosynthesis |                                                      | Isoleucine ↓                           | Isoleucine ↑                           |                              |
| Valine, leucine, and Isoleucine degradation | Succinate ↑, 4-Methyl-2-oxo pentanoic acid ↑         | Methylmalonate ↑, Oxoisocaproate ↓     | Methylmalonate ↑, Oxoisocaproate ↓     |                              |

**Table S1: Altered significant serum metabolites between RA patients and healthy controls with increasing FDR (at FDR 0.25).**

| Metabolite               | HMDB ID     | KEGG ID | Mode                  | MRM           |             | p Value    | FDR      | AUC Score |
|--------------------------|-------------|---------|-----------------------|---------------|-------------|------------|----------|-----------|
|                          |             |         |                       | Precursor ion | Product ion |            |          |           |
| 2-Aminoheptanoicacid     | NA          | NA      | Positive              | 146.1176      | 100.1       | 0.00024272 | 0.030097 | 0.778     |
| Hydroxyisocaproic acid   | HMDB0000746 | NA      | Negative              | 131.006       | 85.1        | 0.00054523 | 0.033804 | 0.856     |
| shikimate                | HMDB0003070 | C00493  | Negative              | 173           | 93          | 0.0023987  | 0.078861 | 0.759     |
| S-ribosyl-L-homocysteine | METPA0405   | C03539  | Positive and Negative | 268.0849      | 88          | 0.0025439  | 0.078861 | 0.759     |
| 1-Methyl-Histidine       | HMDB0000001 | C01152  | Positive              | 170.0924      | 124         | 0.0053824  | 0.1116   | 0.817     |
| Acetylcholine            | HMDB0000895 | C01996  | Positive              | 146.1176      | 43.02       | 0.0071111  | 0.1116   | 0.745     |
| Deoxy carnitine          | NA          | NA      | Positive              | 146.1176      | 60.1        | 0.0075035  | 0.1116   | 0.787     |
| Cystathionine            | HMDB0000099 | C02291  | Positive              | 223.0747      | 134.1       | 0.007844   | 0.1116   | 0.722     |
| 2-Aminooctanoicacid      | NA          | NA      | Positive              | 160.1332      | 55.3        | 0.008432   | 0.1116   | 0.748     |
| Phenyl alanine           | NA          | NA      | Positive              | 166.0963      | 103.1       | 0.0098957  | 0.1116   | 0.727     |
| Inosine                  | HMDB0000195 | C00294  | Negative              | 267           | 135         | 0.0098998  | 0.1116   | 0.773     |
| sn-glycerol-3-phosphate  | HMDB0000126 | C00093  | Negative              | 171           | 79          | 0.01633    | 0.16874  | 0.718     |
| Erythrono-1,4-lactone    | HMDB0000349 | NA      | Positive              | 119.11        | 91.1        | 0.019919   | 0.19     | 0.681     |
| Lactate                  | HMDB0000190 | C00256  | Negative              | 89            | 43.2        | 0.022356   | 0.19801  | 0.734     |
| 2-Hydroxypyridine        | HMDB0013751 | C02502  | Positive              | 96.0444       | 51.1        | 0.029303   | 0.24224  | 0.676     |

**Table S2: Altered significant serum metabolites between RA patients with Low ADA and High ADA activity and healthy controls with increasing FDR (at FDR 0.25).**

| Metabolite               | HMDB ID     | KEGG ID | Mode     | MRM           |             | p Value | FDR    |
|--------------------------|-------------|---------|----------|---------------|-------------|---------|--------|
|                          |             |         |          | Precursor ion | Product ion |         |        |
| 2-Aminoheptanoicacid     | NA          | NA      | Positive | 146.12        | 100.10      | 0.0012  | 0.0803 |
| Hydroxyisocaproic acid   | HMDB0000746 | NA      | Negative | 131.01        | 85.10       | 0.0013  | 0.0803 |
| Fructose-6-Phosphate     | HMDB0000124 | C00085  | Negative | 259.00        | 97.10       | 0.0020  | 0.0812 |
| Hexose-phosphate         | NA          | NA      | Negative | 259.00        | 79.00       | 0.0028  | 0.0878 |
| S-ribosyl-L-homocysteine | METPA0405   | C03539  | Positive | 268.08        | 88.00       | 0.0043  | 0.1065 |
| S-ribosyl-L-homocysteine | METPA0405   | C03539  | Negative | 266.00        | 134.00      | 0.0043  | 0.1065 |
| shikimate                | HMDB0003070 | C00493  | Negative | 173.00        | 93.00       | 0.0106  | 0.1929 |
| Inosine                  | HMDB0000195 | C00294  | Negative | 267.00        | 135.00      | 0.0109  | 0.1929 |
| Acetylcholine            | HMDB0000895 | C01996  | Positive | 146.12        | 43.02       | 0.0155  | 0.2395 |
| Deoxy carnitine          | NA          | NA      | Positive | 146.12        | 60.10       | 0.0192  | 0.2477 |
| 1-Methyl-Histidine       | HMDB0000001 | C01152  | Positive | 170.09        | 124.00      | 0.0200  | 0.2477 |

**Table S3: List of all Significant Pathways from the pathway analysis of the all three published metabolomic datasets**

|   | Study                                                                                                                                         | Metabolic Pathways                                  | P value  |
|---|-----------------------------------------------------------------------------------------------------------------------------------------------|-----------------------------------------------------|----------|
| 1 | LC-MS-based serum metabolomics reveals a distinctive signature in patients with rheumatoid arthritis by Li et al.                             | Aminoacyl-tRNA biosynthesis                         | 9.28E-06 |
|   |                                                                                                                                               | Arginine biosynthesis                               | 9.29E-05 |
|   |                                                                                                                                               | Alanine, aspartate and glutamate metabolism         | 0.000792 |
|   |                                                                                                                                               | Porphyrin and chlorophyll metabolism                | 0.017876 |
|   |                                                                                                                                               | Arginine and proline metabolism                     | 0.028007 |
|   |                                                                                                                                               | Phenylalanine, tyrosine and tryptophan biosynthesis | 0.028113 |
|   |                                                                                                                                               | Nitrogen metabolism                                 | 0.041899 |
|   |                                                                                                                                               | D-Glutamine and D-glutamate metabolism              | 0.041899 |
| 2 | Exploration of the serum metabolite signature in patients with rheumatoid arthritis using gas chromatography–mass spectrometry by Zhou et al. | Aminoacyl-tRNA biosynthesis                         | 1.68E-11 |
|   |                                                                                                                                               | Valine, leucine and isoleucine biosynthesis         | 1.05E-09 |
|   |                                                                                                                                               | Biosynthesis of unsaturated fatty acids             | 0.000558 |
|   |                                                                                                                                               | Valine, leucine and isoleucine degradation          | 0.00092  |
|   |                                                                                                                                               | Phenylalanine, tyrosine and tryptophan biosynthesis | 0.002266 |
|   |                                                                                                                                               | Phenylalanine metabolism                            | 0.01577  |
|   |                                                                                                                                               | Cysteine and methionine metabolism                  | 0.026344 |
| 3 | Diagnostic properties of metabolic perturbations in rheumatoid arthritis by Madsen et al.                                                     | Aminoacyl-tRNA biosynthesis                         | 5.19E-05 |
|   |                                                                                                                                               | Glycine, serine and threonine metabolism            | 0.011364 |
|   |                                                                                                                                               | Valine, leucine and isoleucine biosynthesis         | 0.040642 |

**Table S4: Altered serum metabolites between RA patients with Low ADA and High ADA activity (at FDR 0.25).**

| Metabolite           | HMDB ID     | KEGG ID | Mode     | MRM           |             | p Value   | FDR    | AUC Score    |
|----------------------|-------------|---------|----------|---------------|-------------|-----------|--------|--------------|
|                      |             |         |          | Precursor ion | Product ion |           |        |              |
| Fructose-6-phosphate | HMDB0000124 | C00085  | Negative | 259           | 97.1        | 0.0037946 | 0.2385 | <b>0.856</b> |
| Hexose-phosphate     | HMDB0001401 | C00092  | Negative | 259           | 79          | 0.0038468 | 0.2385 | <b>0.828</b> |

**Table S5: Altered serum metabolites between RA patients with Low ADA activity and healthy controls with increasing FDR (at FDR 0.25).**

| Metabolite             | HMDB ID     | KEGG ID | Mode     | MRM           |             | p Value | FDR   | AUC Score |
|------------------------|-------------|---------|----------|---------------|-------------|---------|-------|-----------|
|                        |             |         |          | Precursor ion | Product ion |         |       |           |
| Hydroxyisocaproic acid | HMDB0000746 | NA      | Negative | 131.006       | 85.1        | 0.0005  | 0.062 | 0.829     |
| 2-Aminoheptanoic acid  | NA          | NA      | Positive | 146.1176      | 100.1       | 0.0017  | 0.108 | 0.808     |
| 2-Amino-octanoic acid  | NA          | NA      | Positive | 160.1332      | 55.3        | 0.0078  | 0.230 | 0.767     |
| Lactate                | HMDB0000190 | C00256  | Negative | 89            | 43.2        | 0.0081  | 0.230 | 0.779     |
| shikimate              | HMDB0003070 | C00493  | Negative | 173           | 93          | 0.0111  | 0.230 | 0.763     |
| Acetylcholine          | HMDB0000895 | C01996  | Positive | 146.1176      | 43.02       | 0.0118  | 0.230 | 0.771     |
| Deoxy carnitine        | NA          | NA      | Positive | 146.1176      | 60.1        | 0.0130  | 0.230 | 0.796     |

**Table S6: Altered serum metabolites between RA patients with High ADA activity and healthy controls with increasing FDR (at FDR 0.25).**

| Metabolite                     | HMDB ID     | KEGG ID | Mode     | MRM       |             | p Value  | FDR  | AUC Score |
|--------------------------------|-------------|---------|----------|-----------|-------------|----------|------|-----------|
|                                |             |         |          | Precursor | Product ion |          |      |           |
| 1-Methyl-Histidine             | HMDB0000001 | C01152  | Positive | 170.1     | 124         | 0.000628 | 0.05 | 0.844     |
| Fructose-6-Phosphate           | HMDB0000124 | C00085  | Negative | 259       | 97.1        | 0.001128 | 0.05 | 0.849     |
| Inosine                        | HMDB0000195 | C00294  | Negative | 267       | 135         | 0.001787 | 0.05 | 0.865     |
| S-ribosyl-L-homocysteine       | METPA0405   | C03539  | Positive | 268.1     | 88          | 0.001884 | 0.05 | 0.844     |
| S-ribosyl-L-homocysteine       | METPA0405   | C03539  | Negative | 266       | 134         | 0.001884 | 0.05 | 0.844     |
| Hydroxyisocaproic acid         | HMDB0000746 | NA      | Negative | 131       | 85.1        | 0.002357 | 0.05 | 0.891     |
| Hexose-phosphate               | NA          | NA      | Negative | 259       | 79          | 0.002601 | 0.05 | 0.818     |
| sn-glycerol-3-phosphate        | HMDB0000126 | C00093  | Negative | 171       | 79          | 0.007594 | 0.13 | 0.786     |
| Trehalose-6-Phosphate          | HMDB0001124 | C00689  | Negative | 421       | 79          | 0.008492 | 0.13 | 0.823     |
| octulose-monophosphate O8P-O1P | NA          | NA      | Negative | 319       | 97          | 0.009833 | 0.14 | 0.797     |
| 2-Aminoheptanoic acid          | NA          | NA      | Positive | 146.1     | 100.1       | 0.011205 | 0.14 | 0.740     |
| N-Aetyl Aspartic acid          | HMDB0000812 | C01042  | Negative | 174       | 88.1        | 0.013835 | 0.14 | 0.781     |
| 6-phospho-D-gluconate          | HMDB0001316 | C00345  | Negative | 275       | 97          | 0.017312 | 0.14 | 0.740     |
| Gly-Leu                        | HMDB0000759 | C02155  | Positive | 189.1     | 171         | 0.017416 | 0.14 | 0.771     |
| Deoxy carnitine                | NA          | NA      | Positive | 146.1     | 60.1        | 0.017518 | 0.14 | 0.776     |
| Ergothionine                   | HMDB0003045 | C05570  | Positive | 230.1     | 186.1059    | 0.017733 | 0.14 | 0.734     |
| Phenyl alanine                 | NA          | NA      | Positive | 166.1     | 103.1       | 0.018122 | 0.14 | 0.755     |
| 4-Methyl-2-oxo pentanoic acid  | NA          | NA      | Positive | 131.1     | 43.06       | 0.019597 | 0.14 | 0.755     |
| Malic acid                     | HMDB0000744 | C03668  | Negative | 133       | 115.1       | 0.021009 | 0.14 | 0.729     |
| Acetylcholine                  | HMDB0000895 | C01996  | Positive | 146.1     | 43.02       | 0.022195 | 0.14 | 0.714     |
| shikimate                      | HMDB0003070 | C00493  | Negative | 173       | 93          | 0.023069 | 0.14 | 0.755     |
| Cystathionine                  | HMDB0000099 | C02291  | Positive | 223.1     | 134.1       | 0.024056 | 0.14 | 0.745     |
| D-sedoheptulose-1-7-phosphate  | NA          | NA      | Negative | 289       | 97          | 0.024315 | 0.14 | 0.760     |
| Glucose-6-Phosphate            | HMDB0001401 | C00092  | Negative | 259       | 97          | 0.026942 | 0.14 | 0.703     |
| Acetylphosphate                | HMDB0001494 | C00227  | Negative | 139       | 79          | 0.028126 | 0.14 | 0.724     |
| Erythrono-1,4-lactone          | HMDB0000349 | NA      | Positive | 119.1     | 91.1        | 0.028416 | 0.14 | 0.750     |
| Betaine                        | HMDB0000043 | C00719  | Positive | 118.1     | 59.2        | 0.037563 | 0.17 | 0.724     |
| HBA                            | HMDB0000357 | C01089  | Negative | 103       | 59.1        | 0.038502 | 0.17 | 0.667     |
| Tyrosine                       | HMDB0000158 | C00082  | Positive | 182.1     | 91          | 0.038726 | 0.17 | 0.688     |
| Fumaric acid                   | HMDB0000134 | C00122  | Negative | 115       | 71.1        | 0.040439 | 0.17 | 0.734     |
| Arginine                       | HMDB0000517 | C00062  | Positive | 175.1     | 60.2        | 0.046664 | 0.19 | 0.745     |
| 4-Coumarate                    | HMDB0002035 | C00811  | Positive | 165       | 119         | 0.055076 | 0.22 | 0.693     |
| succinate                      | HMDB0000254 | C00042  | Negative | 117       | 73          | 0.060176 | 0.23 | 0.708     |
